# Supplementary material
Source: PubMed Central journal article supplement (PMC7517413)
Supplement: oc0c00791_si_001.pdf [file oc0c00791_si_001.pdf]

## Supporting Information

### **Pairing *Bacteroides vulgatus* LPS structure with its immunomodulatory effects on human cellular models**

Flaviana Di Lorenzo,<sup>\*†,‡</sup> Molly D. Pither,<sup>†</sup> Michela Martufi,<sup>□</sup> Iaria Scarinci,<sup>□</sup> Joan Guzman Caldentey,<sup>§</sup> Ewelina Łakomic,<sup>¶</sup> Wojciech Jachymek,<sup>¶</sup> Sven C.M. Bruijns,<sup>∞</sup> Sonsoles Martín Santamaría,<sup>§</sup> Julia-Stephanie Frick,<sup>↓</sup> Yvette van Kooyk,<sup>∞</sup> Fabrizio Chiodo,<sup>∞</sup> Alba Silipo,<sup>†,‡</sup> Maria Lina Bernardini,<sup>□</sup> Antonio Molinaro<sup>\*†,‡</sup>

<sup>†</sup>Department of Chemical Sciences, University of Naples Federico II, 80126 Naples, Italy

<sup>‡</sup>Task Force on Microbiome Studies, University of Naples Federico II, 80126 Naples, Italy

<sup>□</sup>Department of Biology and Biotechnologies “C. Darwin”, Sapienza-University of Rome, 00185 Rome, Italy

<sup>§</sup>Department of Structural and Chemical Biology, Centro de Investigaciones Biológicas, CIB-CSIC, 28040 Madrid, Spain

<sup>¶</sup>Hirsfeld Institute of Immunology and Experimental Therapy, Polish Academy of Sciences, Wrocław 53-114, Poland

<sup>∞</sup>Department of Molecular Cell Biology and Immunology, Amsterdam Infection & Immunity Institute and Cancer Center Amsterdam, Amsterdam UMC, Vrije Universiteit Amsterdam, Amsterdam, The Netherlands.

<sup>↓</sup>Institute of Medical Microbiology and Hygiene, University of Tübingen, 72076 Tübingen, Germany

## Supporting Tables Section

**Table S1.** Interpretation of ESI-IT mass spectra of the saccharide domain of the LPS<sub>Bv</sub>

| Oligosaccharide composition                                                    | Mass of the observed ion | Calculated mass of the ion | Monoisotopic mass of oligosaccharides (Da) |            |
|--------------------------------------------------------------------------------|--------------------------|----------------------------|--------------------------------------------|------------|
|                                                                                | ( <i>m/z</i> )           | ( <i>m/z</i> )             | observed                                   | calculated |
| Kdo·HexN <sub>2</sub> ·Hex <sub>2</sub> ·DeoxyHex <sub>2</sub> ·P              | 627.3                    | 627.19                     | 1256.6                                     | 1256.39    |
| Kdo·HexN·Hex <sub>3</sub> ·DeoxyHex <sub>2</sub> ·P                            | 627.8                    | 627.69                     | 1257.6                                     | 1257.38    |
| Kdo·HexN <sub>2</sub> ·Hex <sub>2</sub> ·DeoxyHex <sub>2</sub> ·P <sub>2</sub> | 444.6 (-3)               | 444.45 (-3)                | 1336.6                                     | 1336.36    |
|                                                                                | 667.3 (-2)               | 667.18 (-2)                | 1336.8                                     |            |
| Kdo·HexN <sub>2</sub> ·Hex <sub>2</sub> ·DeoxyHex <sub>2</sub> ·P <sub>2</sub> | 678.3#                   | -                          | 1336.6                                     | 1336.36    |
| Kdo·HexN <sub>2</sub> ·Hex <sub>3</sub> ·DeoxyHex <sub>2</sub> ·P <sub>2</sub> | 748.3                    | 748.20                     | 1498.6                                     | 1498.41    |
| Kdo·HexN <sub>2</sub> ·Hex <sub>3</sub> ·DeoxyHex <sub>3</sub> ·P <sub>1</sub> | 781.4                    | 781.25                     | 1564.8                                     | 1564.50    |
| Kdo·HexN <sub>3</sub> ·Hex <sub>3</sub> ·DeoxyHex <sub>2</sub> ·P <sub>1</sub> | 788.8                    | 788.76                     | 1579.6                                     | 1579.52    |
| Kdo·HexN <sub>2</sub> ·Hex <sub>3</sub> ·DeoxyHex <sub>3</sub> ·P <sub>2</sub> | 821.3                    | 821.23                     | 1644.6                                     | 1644.47    |
| Kdo·HexN <sub>3</sub> ·Hex <sub>3</sub> ·DeoxyHex <sub>2</sub> ·P <sub>2</sub> | 828.8                    | 828.74                     | 1659.6                                     | 1659.48    |
| Kdo·HexN <sub>2</sub> ·Hex <sub>4</sub> ·DeoxyHex <sub>4</sub> ·P <sub>2</sub> | 650.0 (-3)               | 649.86 (-3)                | 1953.0                                     | 1952.58    |
|                                                                                | 975.4 (-2)               | 975.29 (-2)                | 1952.8                                     |            |
| Kdo·HexN <sub>2</sub> ·Hex <sub>5</sub> ·DeoxyHex <sub>5</sub> ·P <sub>2</sub> | 1129.4                   | 1129.34                    | 2260.8                                     | 2260.69    |

# indicates [M-3H+Na]<sup>2-</sup> ion.

## Supporting Figures Section

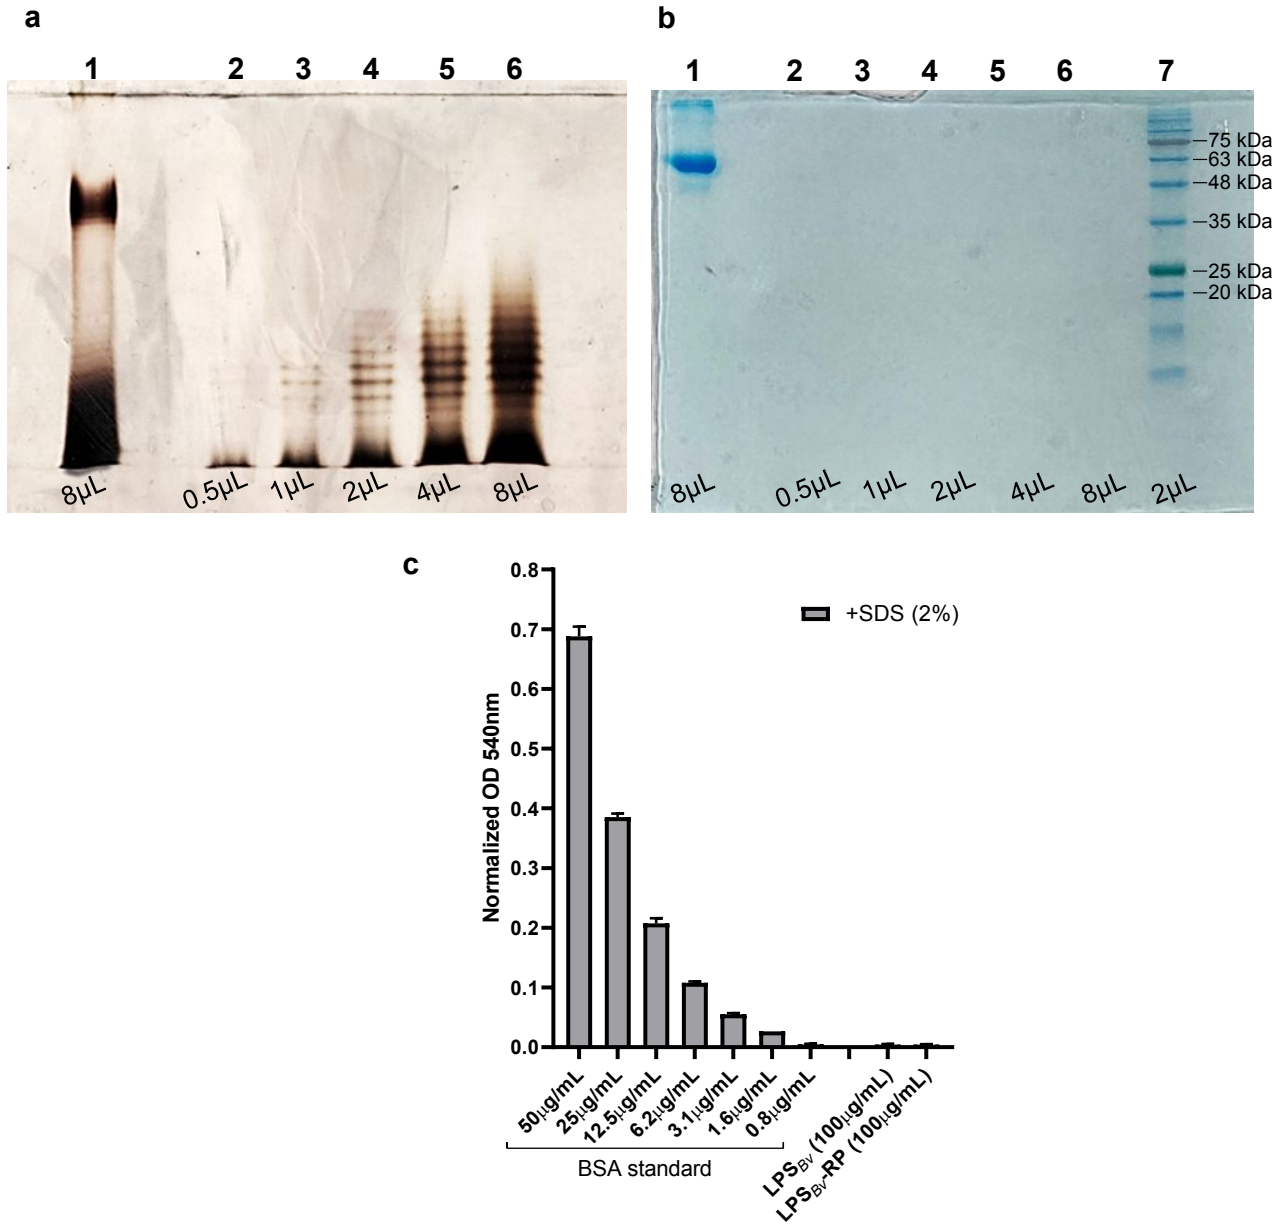

**Figure S1.** Silver (a) and Coomassie Brilliant Blue (b) staining of SDS-PAGE of LPS<sub>Bv</sub>. In the silver stained SDS-PAGE gel (a) LPS from *E. coli* O127:B8 (8  $\mu$ L) (Lane 1) was used as a benchmark; 0.5  $\mu$ L (Lane 2), 1  $\mu$ L (Lane 3), 2  $\mu$ L (Lane 4), 4  $\mu$ L (Lane 5) and 8  $\mu$ L (Lane 6) of 1 mg/mL solution of LPS<sub>Bv</sub> were loaded on the gel. In the Coomassie Brilliant Blue stained SDS-PAGE gel (b) bovine serum albumin (BSA) (8  $\mu$ L) (Lane 1) and BLUeye Prestained Protein Ladder (2  $\mu$ L) (Lane 7) were used as references. Once again 0.5  $\mu$ L (Lane 2), 1  $\mu$ L (Lane 3), 2  $\mu$ L (Lane 4), 4  $\mu$ L (Lane 5) and 8  $\mu$ L (Lane 6) of 1 mg/mL solution of LPS<sub>Bv</sub> were loaded on the gel. (c) Micro BCA™ Protein Assay executed in duplicate in presence of 2 % SDS. BSA at several concentrations has been used as standard. The graph shows the normalized optical density (OD) over the background signal from water samples.

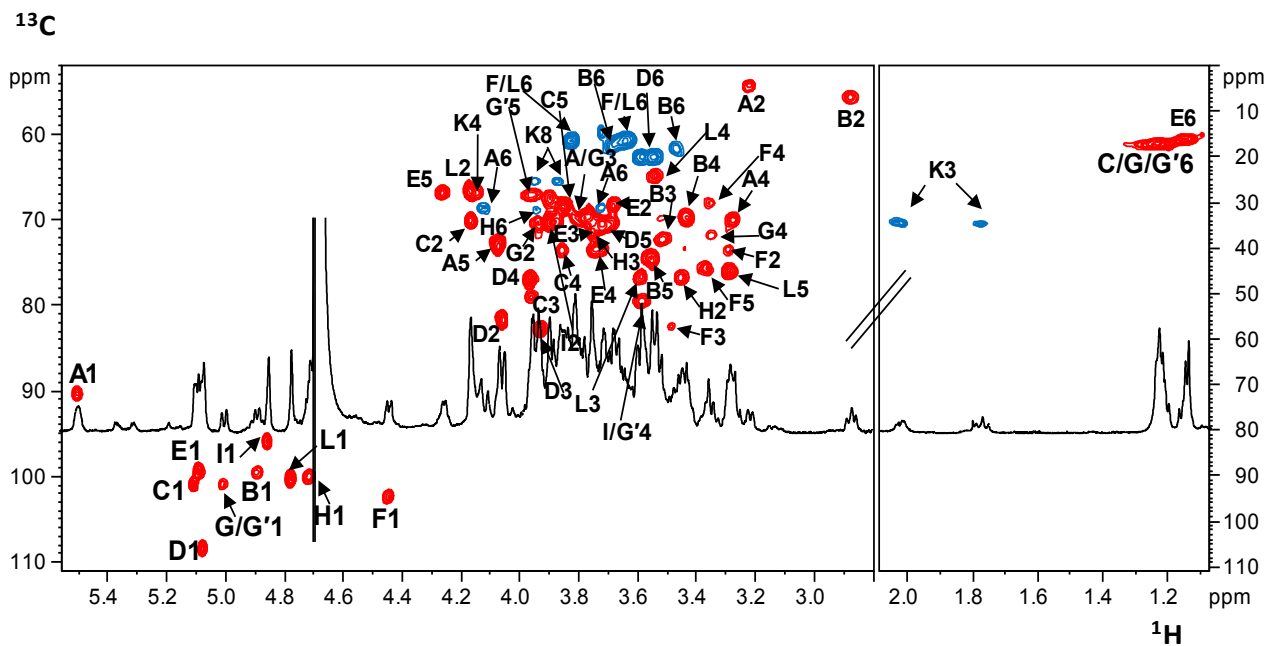

**Figure S2.**  $^1\text{H}$  and  $^{13}\text{C}$  HSQC NMR spectrum of fully deacylated  $\text{LPS}_{Bv}$ . Key heteronuclear signals from the sugar backbone are indicated. Numbering of sugar residues is as reported in Table 1.

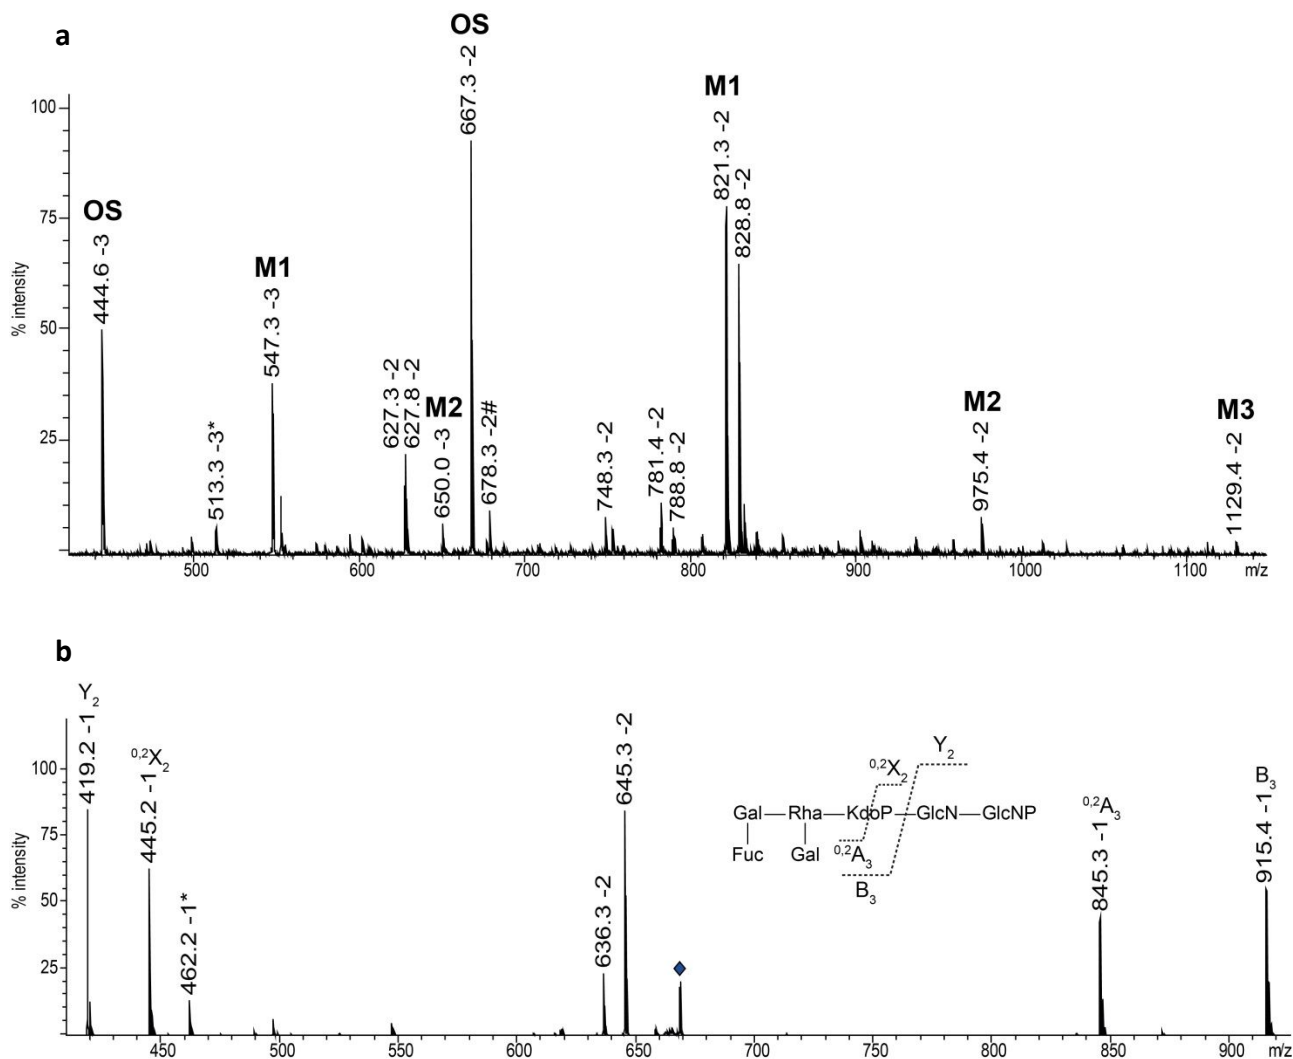

**Figure S3.** ESI-MS spectrum of fully deacylated LPS<sub>Bv</sub> and ESI-MS<sup>2</sup> spectrum of core OS from LPS<sub>Bv</sub>. **(a)** Zoom of mass spectrum with ions corresponding to core OS and core OS substituted with one, two and three O-chain repeating units ( $m/z$  444.6 and 667.3 (OS), 547.3 and 821.3 (M1), 650.0 and 975.4 (M2), as well as 1129.4 (M3) respectively. # indicates  $[M-3H+Na]^{2-}$  ion. Ion indicated by asterisk was not interpreted. **(b)** Core OS was selected for MS<sup>2</sup> fragmentation. B<sub>3</sub> and Y<sub>2</sub> ions are indicated. Other ions indicate fragmentation inside the sugar ring (A<sub>3</sub> and X<sub>2</sub>) with loss of formyl group ( $m/z$  645.3, 636.3 and X<sub>2</sub>). The inset structure represents general structure of core OS. The precursor ion ( $m/z$  667.3) is indicated by diamond. Ion indicated by asterisk was not interpreted.

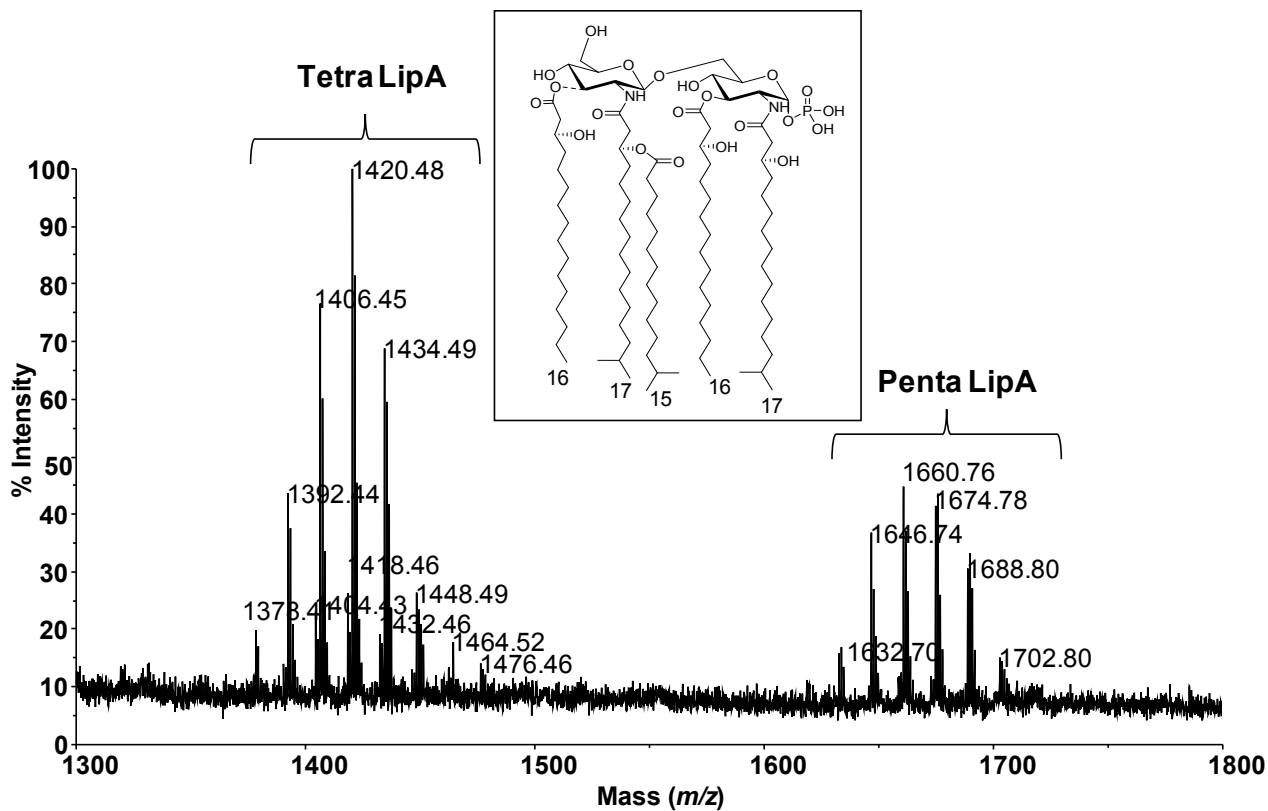

**Figure S4.** MALDI MS spectrum of *B. vulgatus* Lipid A. Zoom of reflectron MALDI TOF mass spectrum, acquired in negative polarity, of purified *B. vulgatus* mpk lipid A. Mass differences of 14 Da, indicative of lipid A species differing in their acyl chain length, are clearly visible. Assignment of the lipid A species is depicted as TetraLip A (tetra-acylated) and PentaLip A (penta-acylated). In the inset, structure of a representative *B. vulgatus* mpk Lipid A species, relative to ion at  $m/z$  1688.3 is depicted.

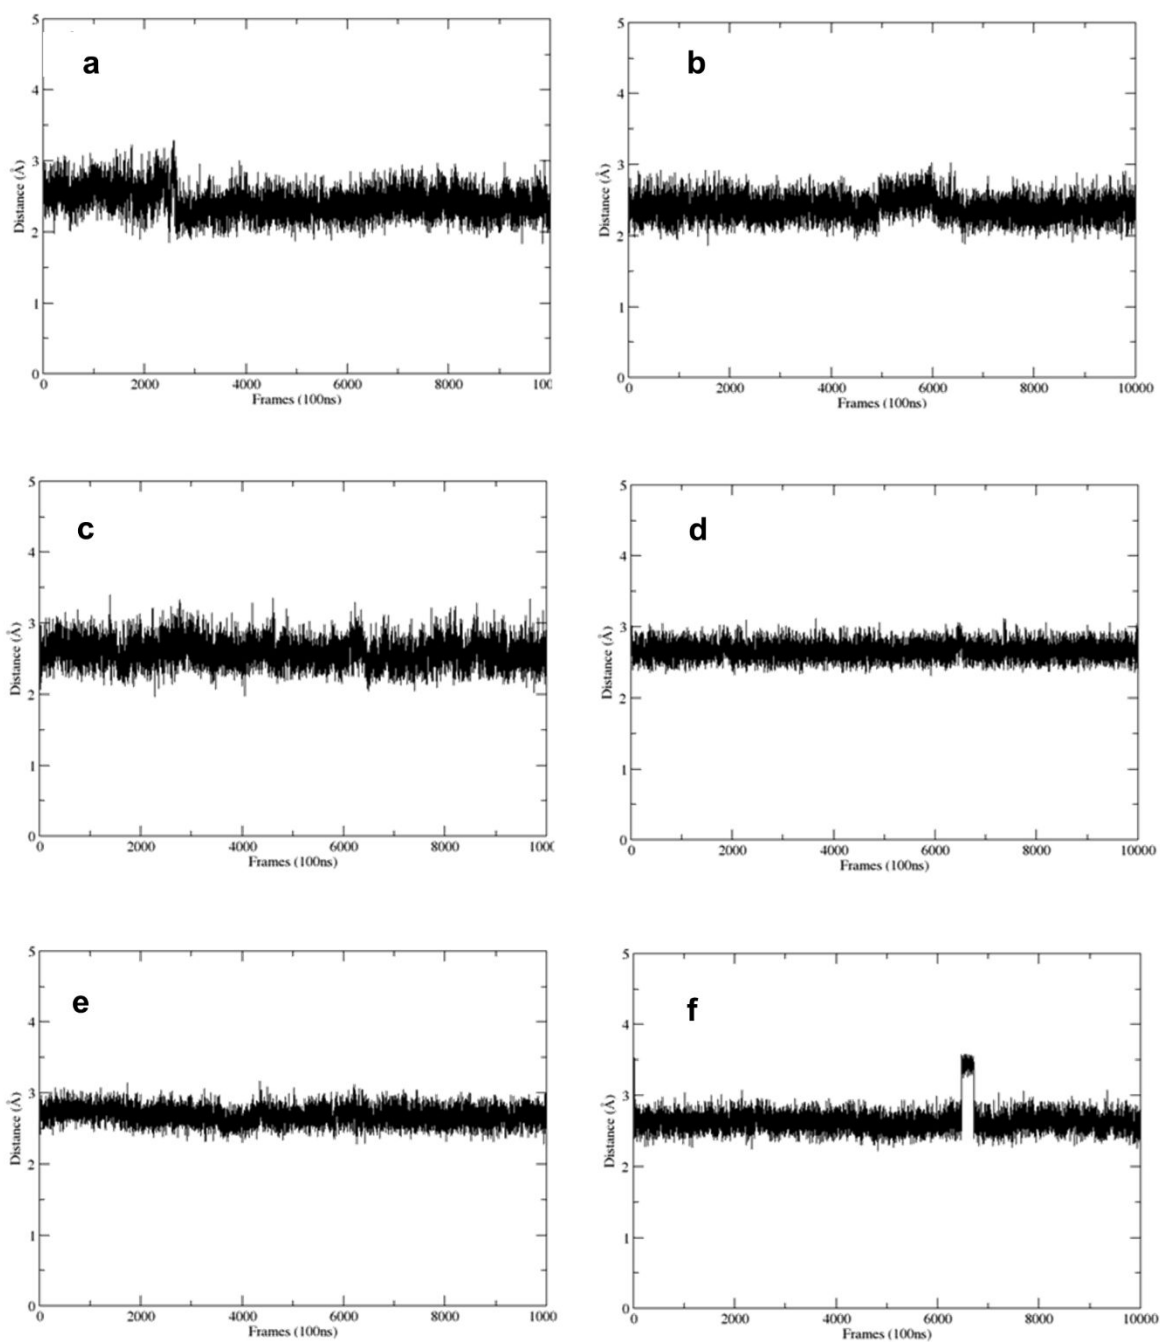

**Figure S5.** Inter-residue distances of tetra-acylated  $LPS_{BV}$ . Distances in Angstroms between (a) H1 of **B** and H6 of **A**; (b) H1 of **D** and H3 of **C**; (c) H1 of **H** and H3 of **C**; (d) C2 of **H** and H1 of **E**; (e) C3 of **F** and H1 of **G**; (f) C6 of **H** and H1 of **F** during the 100ns MD simulation of tetra-acylated  $LPS_{BV}$ .

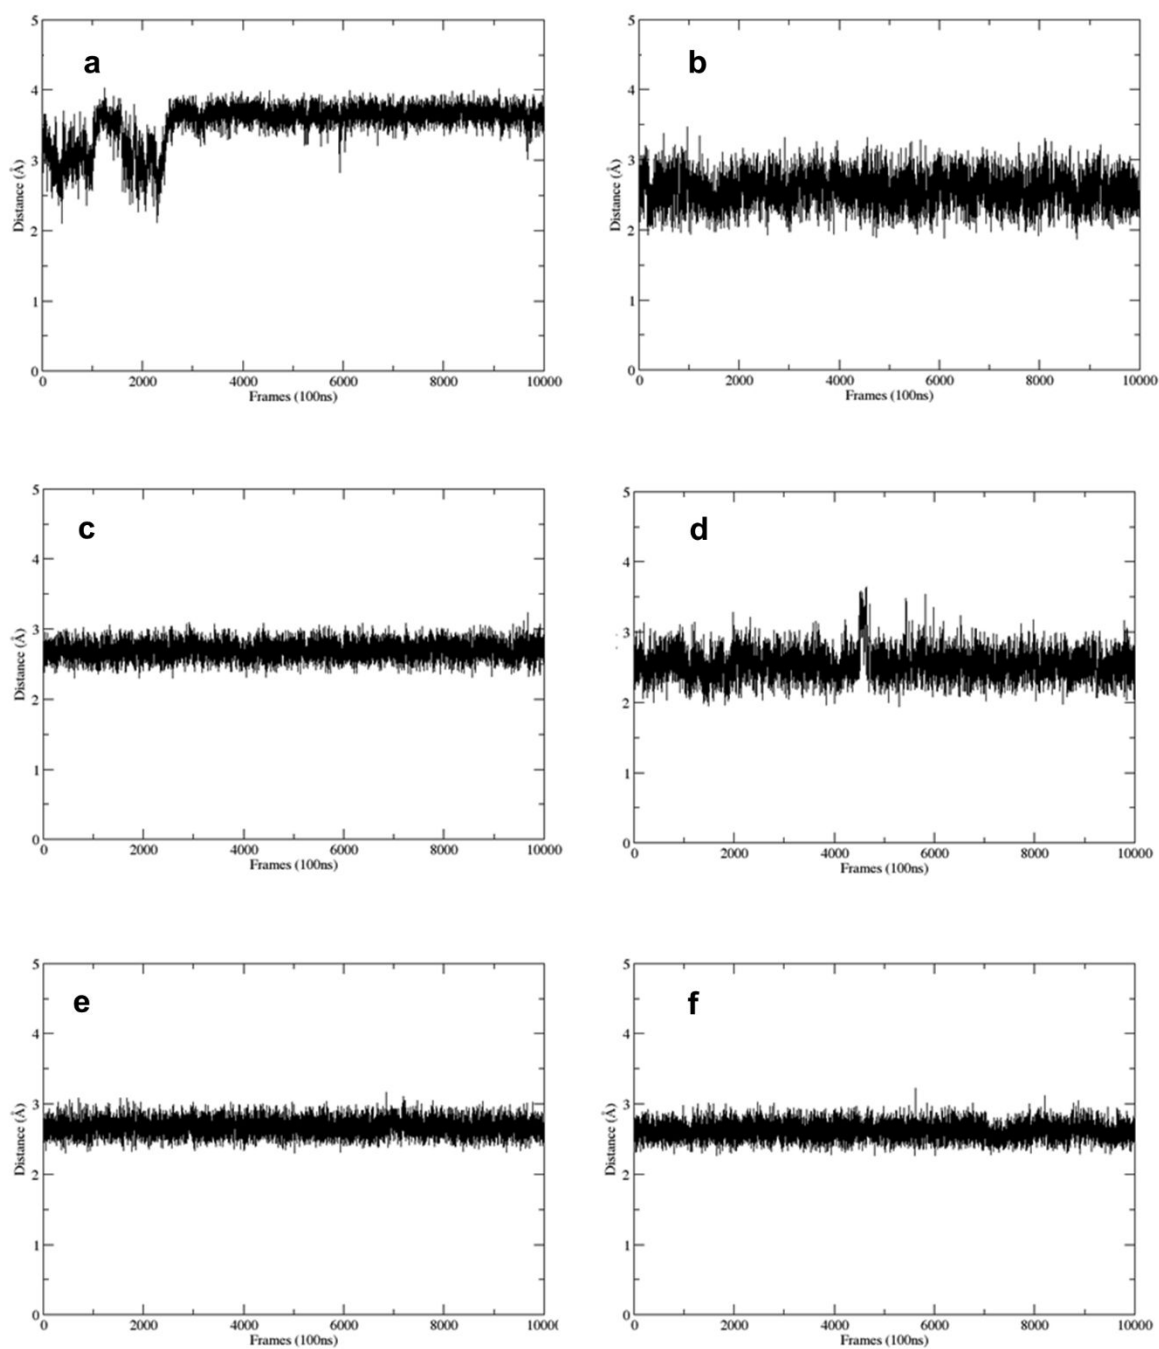

**Figure S6.** Inter-residue distances of penta-acylated  $LPS_{BV}$ . Distances in Angstroms between (a) H1 of **B** and H6 of **A**; (b) H1 of **D** and H3 of **C**; (c) H1 of **H** and H3 of **C**; (d) C2 of **H** and H1 of **E**; (e) C3 of **F** and H1 of **G**; (f) C6 of **H** and H1 of **F** during the 100ns MD simulation of penta-acylated  $LPS_{BV}$ .



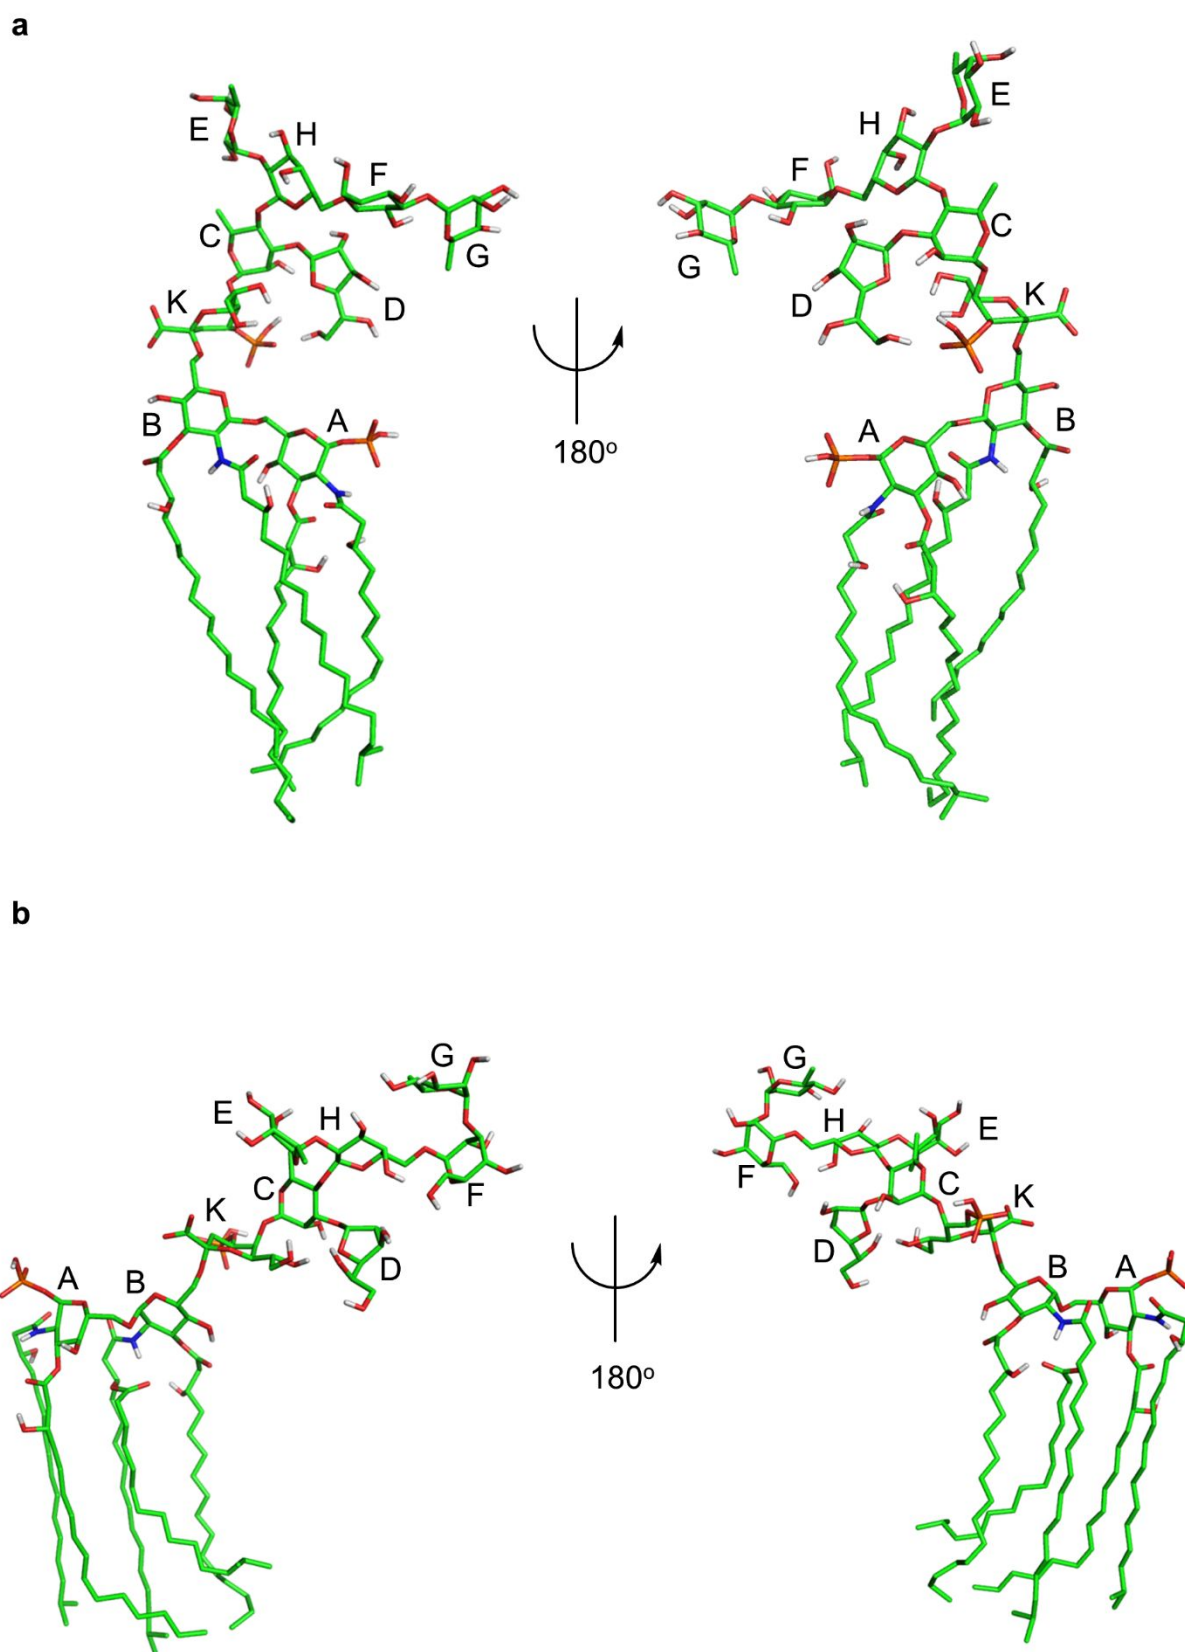

**Figure S7.** 3D structure of tetra-acylated (a) and penta-acylated (b) LPS<sub>Bv</sub> from MD simulation in water. Monosaccharide units are depicted.

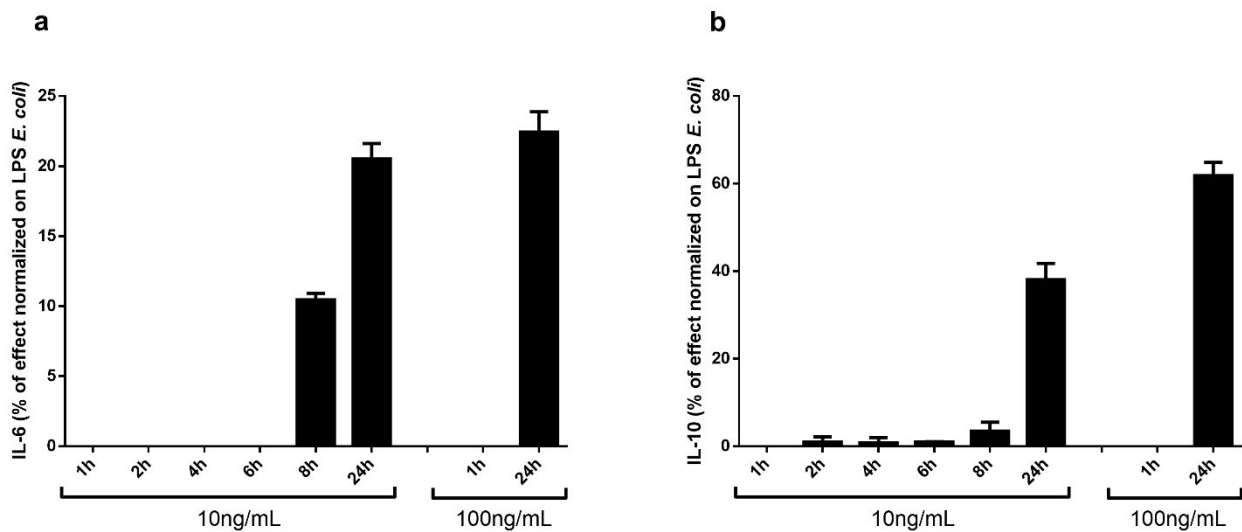

**Figure S8.** IL-6 (a) and IL-10 (b) release in Peripheral Blood-Monocyte-Derived Dendritic Cells (MoDCs) stimulated with LPS<sub>Bv</sub> at different time points measured by ELISA. Data are expressed as percentage of effect and they are normalized over the MoDCs treated with *E. coli* LPS (10 ng/mL at 24 h) set at 100 %. The average results from two donors are shown. Error bars represent the standard deviation of the experiment performed in duplicate.

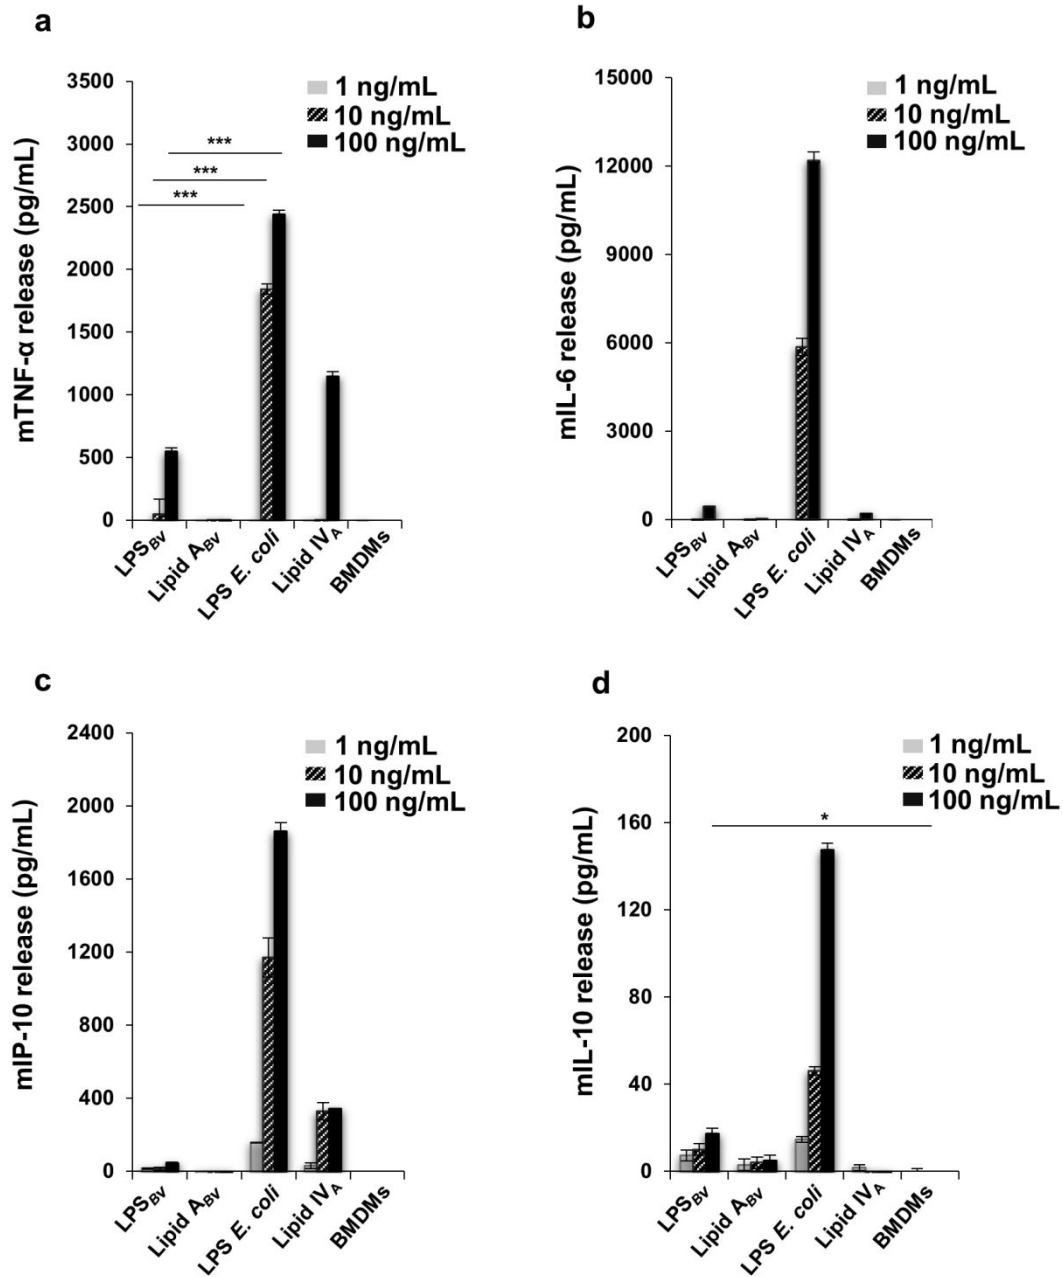

**Figure S9.** Cytokine and chemokine release induced by LPS<sub>Bv</sub> and lipid A<sub>Bv</sub> in murine Bone Marrow Monocyte-derived Macrophages (BMDMs). Release of Tumor Necrosis Factor- $\alpha$  (TNF- $\alpha$ ) (a), IL-6 (b), IP-10 (c) AND IL-10 (d) in BMDMs free supernatants of BMDMs stimulated with LPS<sub>Bv</sub> or lipid A<sub>Bv</sub>, with *E. coli* LPS and with the synthetic antagonist tetra-acylated lipid IV<sub>A</sub> at the concentration of 1, 10 and 100 ng/mL during 12 hours. Cytokine and chemokine release was analyzed through ELISA. Data are expressed as mean  $\pm$  SD of four independent experiments in triplicate. Untreated cells are the negative control in this experiment. \* $p < 0.05$ , \*\* $p < 0.01$ , \*\*\* $p < 0.001$ .

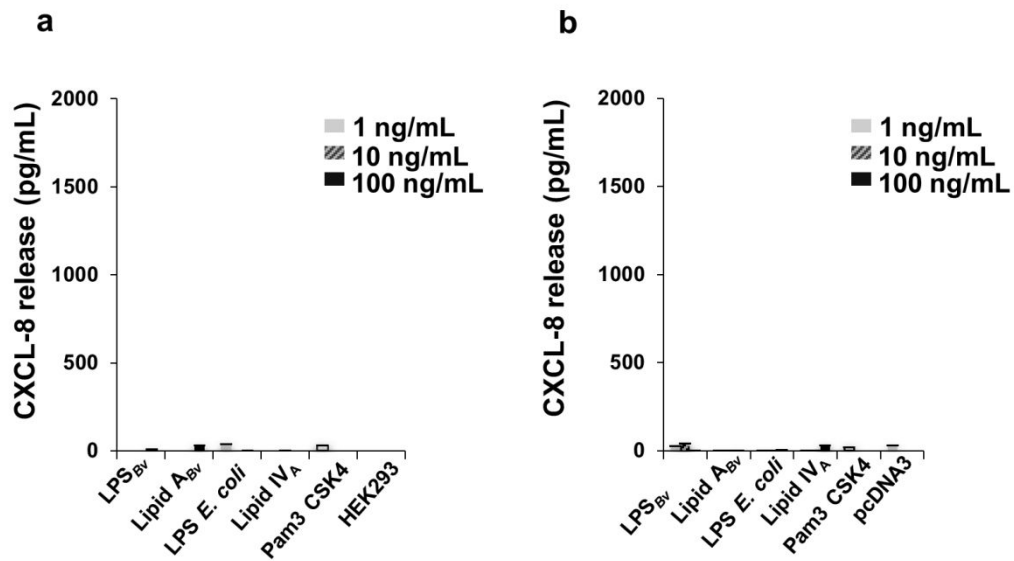

**Figure S10.** Analysis of immunopotential of LPS<sub>Bv</sub> and Lipid A<sub>Bv</sub> in HEK293 cells and HEK293 cells carrying pcDNA3. HEK293 cells (a) and HEK293 pcDNA3 (b) were treated for 6 hours with LPS<sub>Bv</sub> or lipid A<sub>Bv</sub>, with *E. coli* LPS or with the tetra-acylated lipid IV<sub>A</sub> at the concentration of 1, 10 or 100 ng/mL, or with the synthetic TLR2 agonist Pam3 CSK4 (500 ng/mL) for 6 hours. After this time the release of the cytokine CXCL-8 was quantified through ELISA. Untreated cells were the negative control in these experiments.

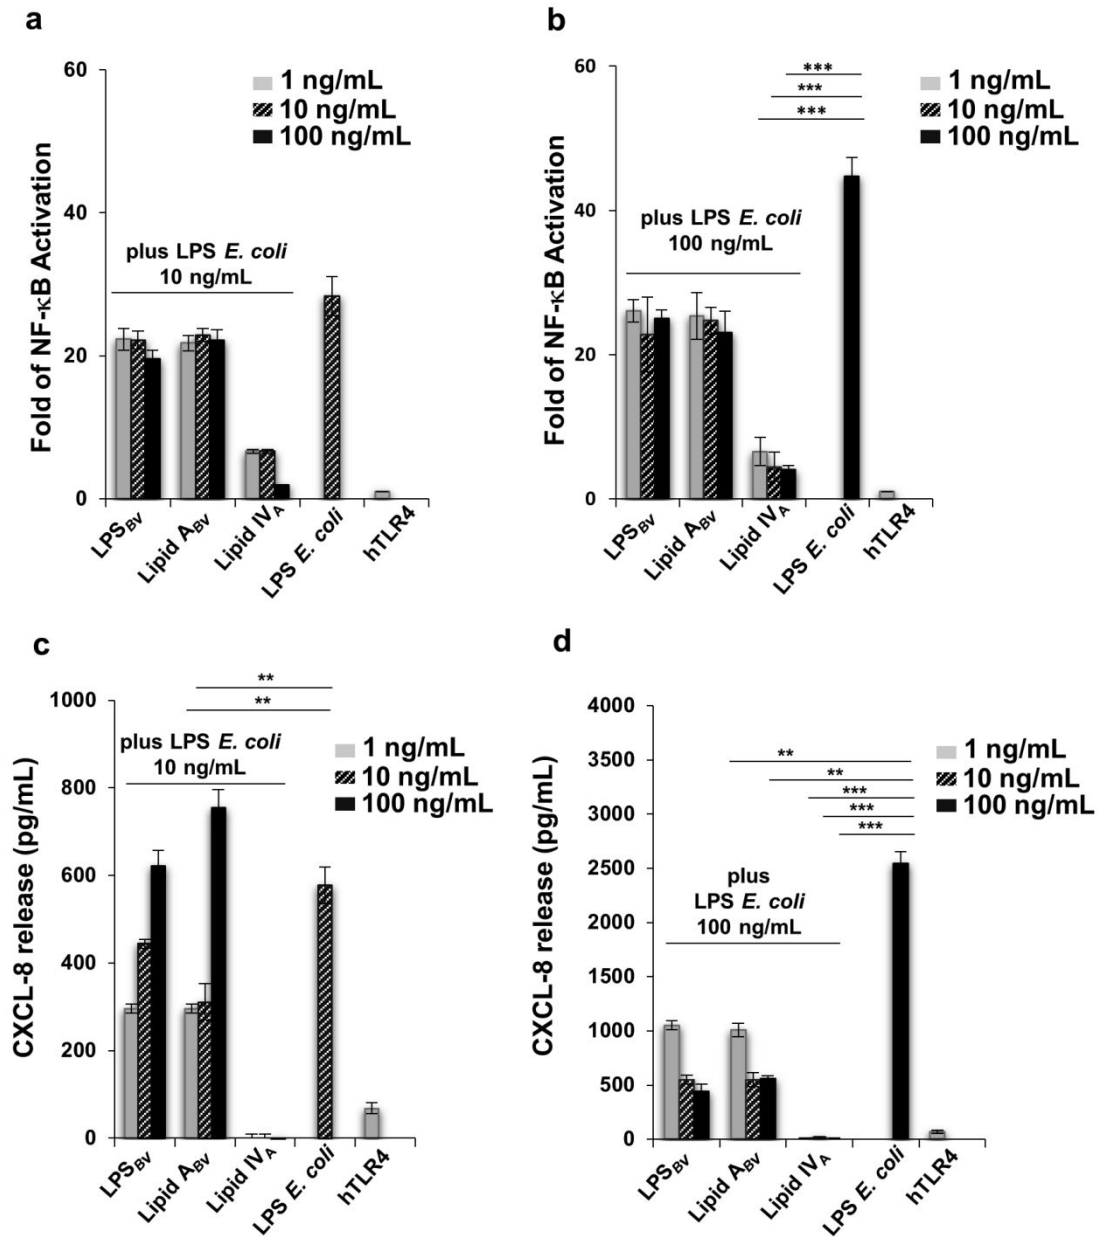

**Figure S11.** Competition assay between LPS<sub>Bv</sub> or lipid A<sub>Bv</sub> with *E. coli* LPS for hTLR4 binding. Fold of NF- $\kappa$ B activation (**a** and **b**) and CXCL-8 release (**c** and **d**) in HEK293 hTLR4/MD2-CD14 cells primed with LPS<sub>Bv</sub> or lipid A<sub>Bv</sub> or with lipid IV<sub>A</sub> at the concentration of 1, 10 and 100 ng/mL for 1 hour and then stimulated with 10 (**a** and **c**) or 100 ng/mL (**b** and **d**) of *E. coli* LPS for 4 hours. Data are expressed as mean  $\pm$  SD of four independent experiments in triplicate. Untreated cells are the negative control in these experiments. \* $p$ <0.05, \*\* $p$ <0.01, \*\*\* $p$ <0.001.
